# Supplementary material for: Cationic tetrakis(nucleobase)complexes of PtII as metalloligands and potential building blocks for molecular architectures
Source: Royal Society of Chemistry journal article supplement (doi:10.1039/b502251g), 2005-01-01
Supplement: b502251g.pdf [file b502251g.pdf]

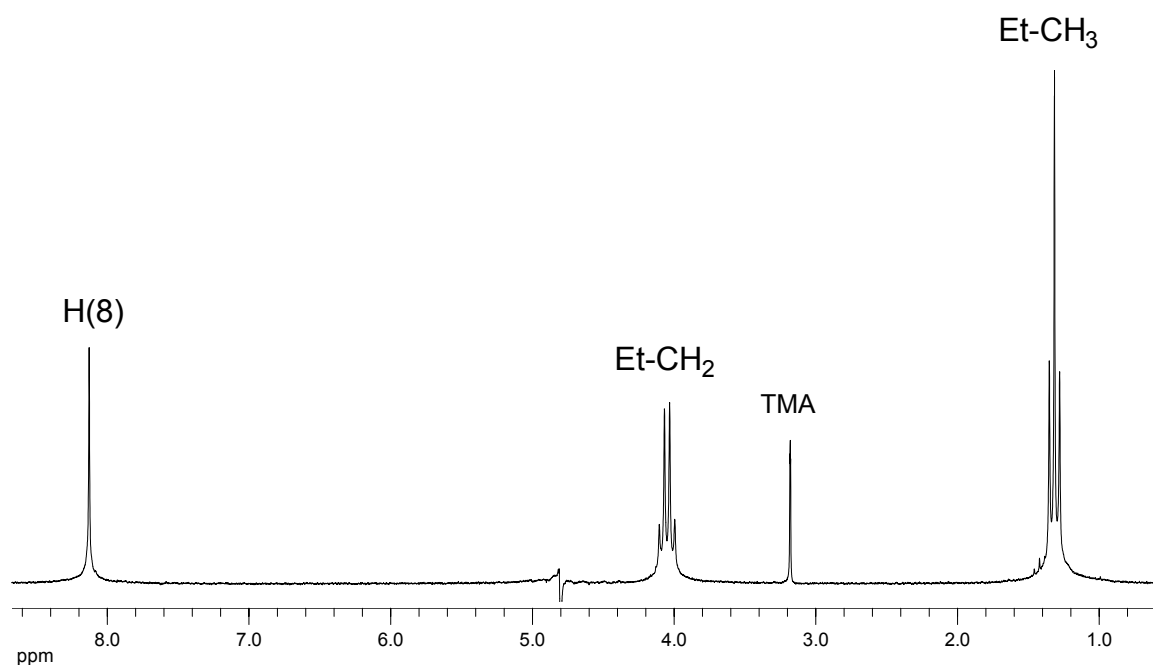

$^1\text{H}$  NMR spectrum of **2** ( $\text{D}_2\text{O}$ , pH 4.5)

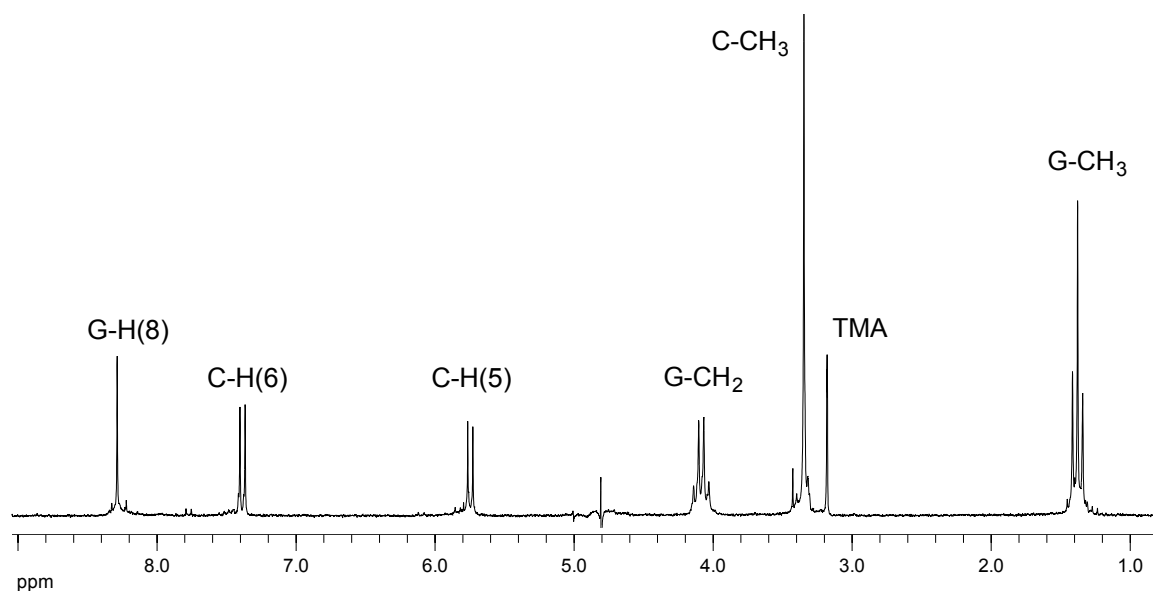

$^1\text{H}$  NMR spectrum of **3** ( $\text{D}_2\text{O}$ , pH 4.5)

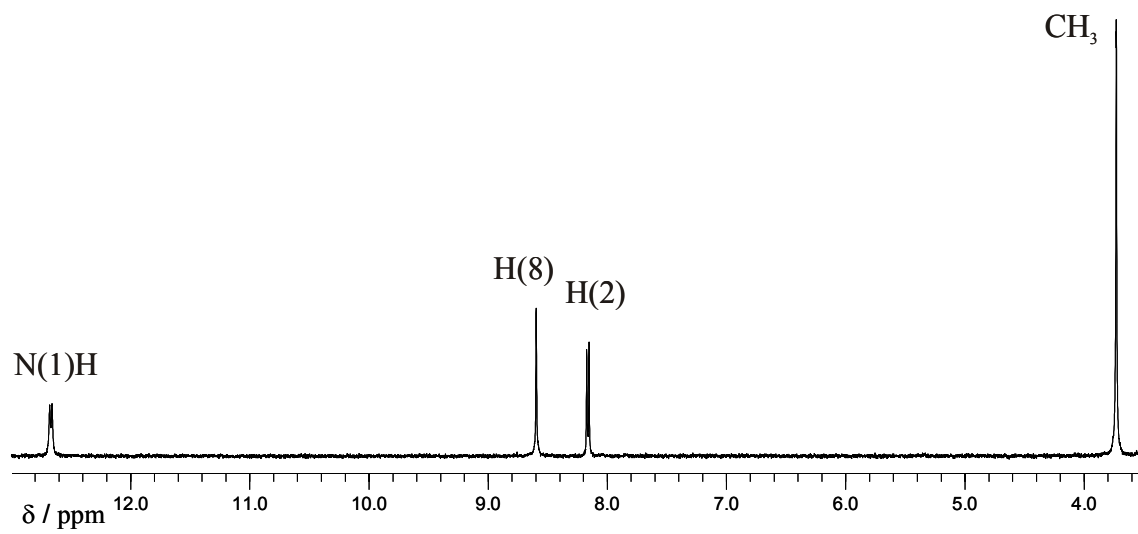

$^1\text{H}$  NMR spectrum of **1** (DMSO-*d*<sub>6</sub>)

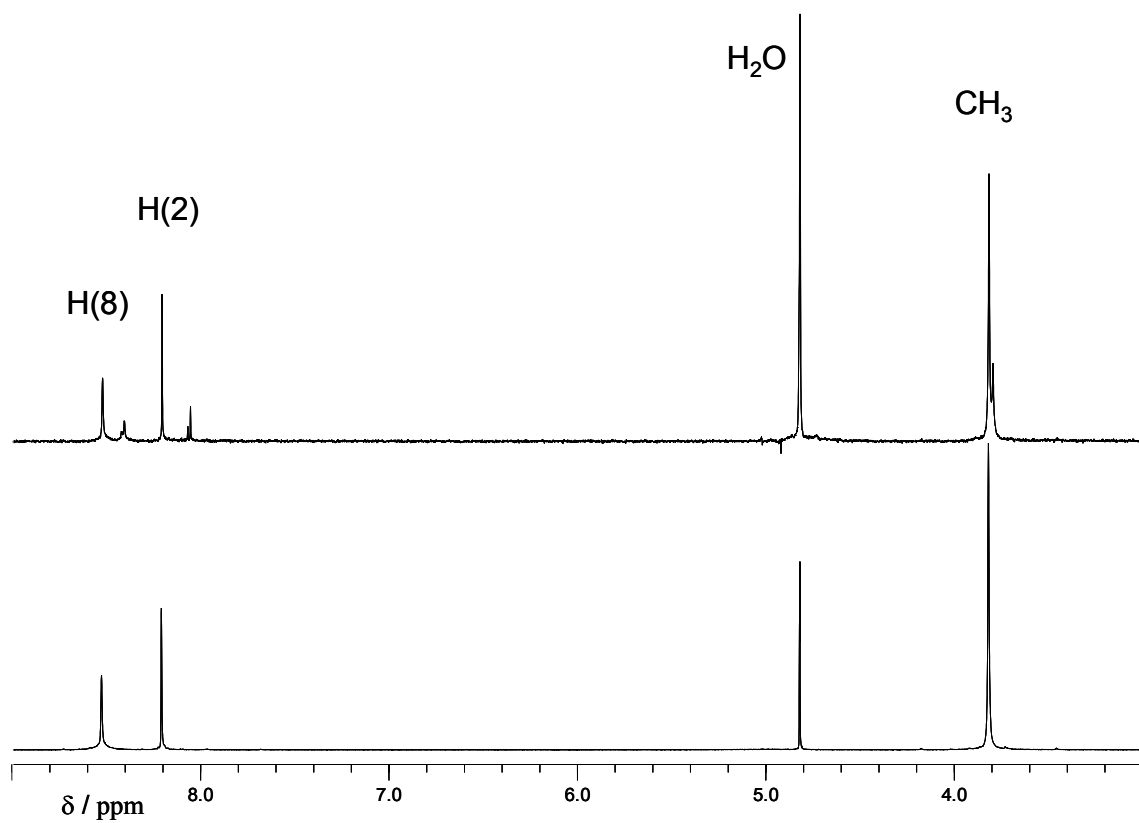

$^1\text{H}$  NMR spectrum ( $\text{D}_2\text{O}$ ) of **1** with  $\text{Hg}(\text{CH}_3\text{COO})_2$  (0.5 equiv) immediately after mixing.
